# Supplementary material for: Fractional Brownian motion and multivariate‐t models for longitudinal biomedical data, with application to CD4 counts in HIV‐positive patients
Source: PubMed Central journal article supplement (PMC4982109; doi:10.1002/sim.6788), 2015-11-10
Supplement: SIM-35-1514-s002.pdf [file SIM-35-1514-s002.pdf]

**Supplementary Table S2** Summary of simulation study to assess bias in the estimation of between-group differences in intercept ( $\delta_0$ ) and slope ( $\delta_1$ ) within a single model when different patterns of censoring are applied to the two groups. Using the probability distribution of the ‘RS+fBM+ME multivariate-t model’ fitted to the real dataset, two groups of either 100 or 200 patients each were simulated with three observations per year up to 5 years, with the first group subject to censoring at the ‘200 cut-off’ while the ‘500 cut-off’ was applied for the second group (with corresponding ‘confirmatory’ observations in each case). Alongside a model of the correct form, normal linear mixed models were fit with a random slopes (RS) structure alone and with RS in combination with Brownian motion (BM) and fractional Brownian motion (fBM) processes (all with ME). 500 iterations of the simulation were performed for each group size. The true value of both  $\delta_0$  and  $\delta_1$  was set to zero, and were estimated as the difference in mean intercept and slope parameter for the second group relative to the first.

|                                 | RS+ME  | RS+BM+ME | RS+fBM+ME | MVT:RS+fBM+ME |
|---------------------------------|--------|----------|-----------|---------------|
| <b>Group size=100 each</b>      |        |          |           |               |
| Bias: $\hat{\delta}_0$          | 0.091  | 0.027    | 0.022     | 0.020         |
| $SD(\hat{\delta}_0)$            | 0.806  | 0.771    | 0.758     | 0.651         |
| $Mean(\widehat{SE}_{\delta_0})$ | 0.805  | 0.765    | 0.754     | 0.655         |
| Coverage: $\delta_0$            | 95.0   | 94.8     | 94.5      | 94.6          |
| Bias: $\hat{\delta}_1$          | -0.143 | -0.108   | 0.004     | 0.004         |
| $SD(\hat{\delta}_1)$            | 0.275  | 0.270    | 0.271     | 0.230         |
| $Mean(\widehat{SE}_{\delta_1})$ | 0.278  | 0.294    | 0.268     | 0.237         |
| Coverage: $\delta_1$            | 92.0   | 95.6     | 94.5      | 95.6          |
| Failed (%)                      | 0.0    | 0.6      | 2.2       | 3.8           |
| <b>Group size=200 each</b>      |        |          |           |               |
| Bias: $\hat{\delta}_0$          | 0.04   | -0.020   | -0.014    | -0.007        |
| $SD(\hat{\delta}_0)$            | 0.576  | 0.554    | 0.547     | 0.471         |
| $Mean(\widehat{SE}_{\delta_0})$ | 0.572  | 0.544    | 0.536     | 0.465         |
| Coverage: $\delta_0$            | 95.0   | 95.0     | 94.6      | 94.6          |
| Bias: $\hat{\delta}_1$          | -0.163 | -0.128   | -0.016    | -0.013        |
| $SD(\hat{\delta}_1)$            | 0.197  | 0.192    | 0.189     | 0.164         |
| $Mean(\widehat{SE}_{\delta_1})$ | 0.197  | 0.208    | 0.190     | 0.168         |
| Coverage: $\delta_1$            | 87.0   | 92.4     | 95.0      | 94.8          |
| Failed (%)                      | 0.0    | 0.0      | 0.8       | 0.2           |

ME, measurement error; MVT, multivariate-t distribution.
